# Supplementary material for: Mortality Benefits of Antibiotic Computerised Decision Support System: Modifying Effects of Age
Source: PubMed Central journal article supplement (PMC4663624; doi:10.1038/srep17346), 2015-11-30
Supplement: srep17346-s1.pdf [file srep17346-s1.pdf]

# SUPPLEMENT

## **Mortality Benefits of Antibiotic Computerised Decision Support System:**

### **Modifying Effects of Age**

**Angela LP Chow, PhD<sup>1,2</sup>, David C Lye, FRACP<sup>3,4</sup>, Onyebuchi A Arah, PhD<sup>2,5</sup>**

<sup>1</sup> Department of Clinical Epidemiology, Institute of Infectious Disease and Epidemiology, Tan Tock Seng Hospital, Singapore

<sup>2</sup> Department of Epidemiology, Fielding School of Public Health, University of California, Los Angeles (UCLA), Los Angeles, United States

<sup>3</sup> Department of Infectious Diseases, Institute of Infectious Disease and Epidemiology, Tan Tock Seng Hospital, Singapore

<sup>4</sup> Yong Loo Lin School of Medicine, National University of Singapore, Singapore

<sup>5</sup> Center for Health Policy Research, University of California, Los Angeles (UCLA), Los Angeles, United States

**Supplementary Table S1. Empiric Antibiotics Recommended by Computerised Decision Support System, by Commonly Diagnosed Infection**

| <b>Diagnosed infection</b>                              | <b>Recommended antibiotics for empiric therapy</b> |
|---------------------------------------------------------|----------------------------------------------------|
| Community-acquired pneumonia                            | Amoxicillin-clavulanate, Clarithromycin            |
| Severe community-acquired pneumonia                     | Penicillin, Ceftazidime, Azithromycin              |
| Healthcare-associated pneumonia                         | Piperacillin-tazobactam, Vancomycin                |
| Acute cholecystitis/cholangitis/<br>gallbladder empyema | Amoxicillin-clavulanate, Gentamicin                |
| Liver abscess                                           | Amoxicillin-clavulanate                            |
| Pyelonephritis/<br>perinephric abscess                  | Cefazolin, Gentamicin                              |
| Cystitis                                                | Co-trimoxazole                                     |
| Sepsis                                                  | Cloxacillin, Ceftazidime, Clindamycin              |
